# Supplementary material for: Automated capture-based NGS workflow: one thousand patients experience in a clinical routine framework
Source: publisher site journal article supplement (doi:10.1515/dx-2021-0051), 2021-06-16
Supplement: Supplementary file 1 [file j_dx-2021-0051_suppl_001.docx]

**Supplemental material**

**Supplementary Methods**

The Hamilton’s STARlet deck is organized as shown in the scheme (Figure S1) and in the picture in the Diagnostics Application Note (<https://www.hamiltoncompany.com/press-releases/application-note-automation-of-the-hereditary-cancer-solution-hcs-by-sophia-genetics-on-a-starlet#top>). The STARlet has 8 independent channels that may remove/dispense liquids; alternatively, they can attach grippers to move 96-wells plates in on-deck different positions; the STARlet has a clear cover with UV lamp for deck sterilization.

Briefly, the two-days’ workflow is organised as follows.

Day 1.

The STARlet is switched-on and the program is launched with a 24 samples’ input worklist. Fragmentation/Adapter Ligation/Amplification/Post-amplification clean-up steps are checked. Twenty-four diluted DNAs are placed in a 96-wells plate and positioned in the plate cooling module (position 6); enhancer, fragmentation, adapters ligation and amplification SOPHiA’s reagents are placed in the plate cooling-module together with empty 1.5ml conical tubes (position 6); paramagnetic beads, water, Tris-EDTA buffer from SOPHiA’s HCS kit, are placed in 1.5ml conical tubes reagent carriers (position 4) and 80% e

thanol in one of the reagent’s troughs (position 7); SOPHiA’s plate with 48 dual index DNA adapters and a new empty 96-wells plate are positioned in roomT plate positions (positions 10a and 10b, respectively).

According to SOPHiA’s indications, the liquid handler adds the Enhancer to the diluted DNA samples and prepares the fragmentation, ligation and amplification working mixes starting from the kit’s original tubes placed in the cooling station. Working mixes are maintained in the cooling station till the end of the procedure. The STARlet adds the fragmentation mix to the samples in the 96-wells plate and transfers it to the thermal cycler; seals the plate with the lid, the thermal cycler closes and the fragmentation starts. Meanwhile the liquid handler transfers the appropriate volume of the 24 dual index DNA adapters used in each working session from the original plate to the new one (from position 10a to 10b).

Laboratory staff can now recover the SOPHiA’s reagents leftovers from position 6 together with the 24 dual index DNA adapters not used from position 10a, and put them back to the freezer.

At the end of the fragmentation step, the thermal cycler opens and the robot transfers the fragmented DNA samples to the new plate containing the Illumina indexes, adds the adapter ligation mix to each sample and makes the ligation start; when the ligation step comes to the end, the samples are cleaned-up as well as all dual sized by means of paramagnetic beads (position 4) and ethanol (position 7), following the manufacturer’s protocol indications. When the STARlet accomplishes the dual size selection, moves the plates to the plate-cooler and adds the amplification mix. At the end of the pre-capture amplification, the samples are beads-based purified again and resuspended in water. The plate containing the samples can be removed from the STARlet’s deck together with all the reagents and the UV decontamination can start. The laboratory staff can now proceed to the quality control steps and then to the samples pooling (12 samples are pooled in the first pool and 12 in the second one). At the end, the two pools are lyophilized in a speed-vacuum system and put at -20°C overnight.

Day 2.

The STARlet is switched-on and the program is launched with the input of working with two samples pools. Capture-based hybridization/ Binding of Hybridized Targets to Streptavidin Beads/ Washing Streptavidin Beads to Remove Unbound DNA/Post-capture Amplification/Post-capture Amplification Clean Up steps are checked. Following the SOPHiA’s users’ guide, the lyophilized frozen pools are resuspended in the hybridization mix in two separated wells of a plate and placed at roomT (position 10b). An extra empty plate put in position 10a. Streptavidin beads and thawed post-capture washing buffers are placed in the reagents’ carriers at roomT (position 4) together with equal numbers of empty 1.5ml tubes. Post capture amplification mix is placed in the cooling module (position 6) and paramagnetic beads and resuspension buffer in position 4. Ethanol (80% dilution in water) placed in one of the reagent’s troughs (position 7).

According to SOPHiA’s indications, the liquid handler prepares post-capture working dilutions of washing buffers and moves the pools’ plate to the thermal cycler. It adds the diluted washing buffers to be used at the same hot hybridization temperature to some of the empty wells. Hybridization steps start and when they finish, washed strepatividin beads are added and the binding of hybridized targets takes place. Working quickly to ensure that the temperature remains close to the hybridization one, the STARlet accomplishes the multiple washing steps with the different hot washing buffers and then moves the hybridized targets’ pools to roomT (position 10b) to complete with additional washing steps (the STARlet uses alternatively the shaker and the magnet, position 8 and 9 respectively). When it comes to the end, the liquid handler adds the amplification mix (position 7) to the purified captured pools and transfers the plate to the thermal cycler, where the post-capture amplification is performed. When the amplification step terminates, the amplified captured pools are cleaned-up by means of paramagnetic beads (position 4) and ethanol (position 7) and finally resuspended in Tris-EDTA buffer. Laboratory staff can now proceed to the quality control steps and then to the Illumina’s run set up, meanwhile, the reagents’ leftovers can be removed and the STARlet can be decontaminated and switch off.

**Figure S1. STARlet’s deck scheme.** 1. 96-wells plate lid park position; 2. On-Deck thermal cycler; 3. Tips racks; 4. 1.5ml conical tubes reagents carriers at room temperature (roomT); 5. 96-wells plate cooling module; 6. 1.5 conical tubes cooling module; 7. Reagents troughs; 8. Shaker, 9. Magnet for 96-wells plate; 10a and 10b. Room temperature plate positions; 11. Liquid waste; 12. Tips waste; 13. Grippers park position.
